# Supplementary material
Source: PubMed Central journal article supplement (PMC5363299)
Supplement: mmc1.pdf [file mmc1.pdf]

**YMTHE, Volume 25**

**Supplemental Information**

**Quantitative PET Reporter Gene Imaging**

**with [<sup>11</sup>C]Trimethoprim**

**Mark A. Sellmyer, Iljung Lee, Catherine Hou, Brian P. Lieberman, Chenbo Zeng, David A. Mankoff, and Robert H. Mach**

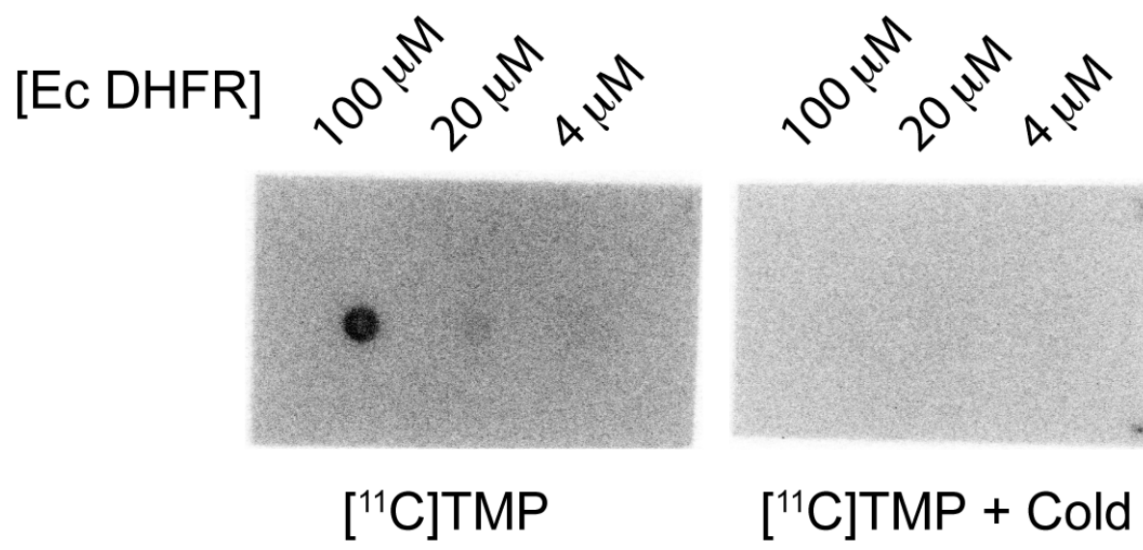

**Fig. S1.** Dot blot showing various concentrations (100-4  $\mu$ M) of recombinant *Ec* DHFR spotted on to a nitrocellulose membrane, dried for 1h, blocked, and then incubated in 5% milk with [ $^{11}$ C]TMP with or without cold TMP (10  $\mu$ M) for 30 minutes. Representative blot is shown for an experiment in biological duplicate.

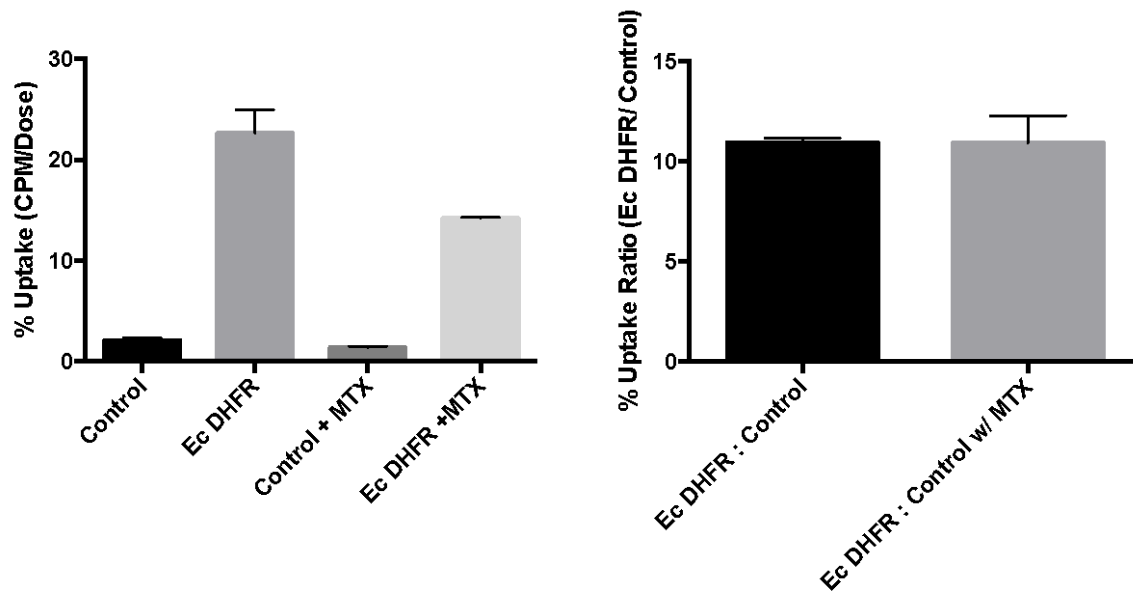

**Fig. S2.** HEK293 cell uptake study was performed with Methotrexate cotreatment. Confluent control or *Ec* DHFR cells were trypsinized, incubated with [ $^{11}\text{C}$ ]TMP with and without co-treatment with Methotrexate (10  $\mu\text{M}$ , MTX). Cells were washed twice with PBS and then measured for uptake with a gamma counter. Fold uptake is shown in the right graph. Error bars represent standard deviation (n=3).

(% dose/organ)

|                 | <b>2 min<br/>(N=4)</b> | <b>15 min<br/>(N=4)</b> | <b>45 min<br/>(N=4)</b> |
|-----------------|------------------------|-------------------------|-------------------------|
| <b>Blood</b>    | 4.59 ± 1.08            | 1.86 ± 0.41             | 0.81 ± 0.23             |
| <b>Heart</b>    | 0.60 ± 0.19            | 0.16 ± 0.03             | 0.03 ± 0.00             |
| <b>Muscle</b>   | 7.26 ± 1.09            | 7.57 ± 1.58             | 8.48 ± 3.54             |
| <b>Lung</b>     | 1.17 ± 0.27            | 0.41 ± 0.07             | 0.14 ± 0.04             |
| <b>Kidney</b>   | 11.8 ± 2.73            | 2.71 ± 0.42             | 0.59 ± 0.09             |
| <b>Pancreas</b> | 0.48 ± 0.27            | 0.42 ± 0.14             | 0.09 ± 0.02             |
| <b>Spleen</b>   | n/a                    | 0.28 ± 0.05             | 0.08 ± 0.04             |
| <b>Liver</b>    | 18.5 ± 2.84            | 5.30 ± 0.82             | 2.33 ± 0.58             |
| <b>Skin</b>     | 2.68 ± 0.42            | 2.97 ± 0.49             | 2.85 ± 1.46             |
| <b>Brain</b>    | 0.14 ± 0.03            | 0.12 ± 0.05             | 0.06 ± 0.03             |
| <b>Bone</b>     | 4.65 ± 1.04            | 3.30 ± 0.60             | 3.01 ± 1.09             |
| <b>Stomach</b>  | 0.93 ± 0.18            | 0.92 ± 0.23             | 0.44 ± 0.17             |
| <b>Gut</b>      | 7.80 ± 1.24            | 6.53 ± 1.30             | 3.64 ± 1.44             |

(% dose/gram)

|                 | <b>2 min<br/>(N=4)</b> | <b>15 min<br/>(N=4)</b> | <b>45 min<br/>(N=4)</b> |
|-----------------|------------------------|-------------------------|-------------------------|
| <b>Blood</b>    | 3.39 ± 0.81            | 1.28 ± 0.29             | 0.59 ± 0.16             |
| <b>Heart</b>    | 6.76 ± 2.37            | 1.69 ± 0.41             | 0.35 ± 0.01             |
| <b>Muscle</b>   | 0.94 ± 0.16            | 0.91 ± 0.20             | 1.07 ± 0.42             |
| <b>Lung</b>     | 5.84 ± 1.51            | 2.14 ± 0.45             | 0.84 ± 0.23             |
| <b>Kidney</b>   | 46.6 ± 9.10            | 10.6 ± 2.03             | 2.37 ± 0.35             |
| <b>Pancreas</b> | 5.25 ± 2.48            | 4.28 ± 1.44             | 1.01 ± 0.24             |
| <b>Spleen</b>   | n/a                    | 2.72 ± 0.66             | 0.89 ± 0.40             |
| <b>Liver</b>    | 19.8 ± 4.75            | 5.55 ± 0.97             | 2.68 ± 0.72             |
| <b>Skin</b>     | 0.93 ± 0.18            | 0.95 ± 0.18             | 0.98 ± 0.54             |
| <b>Brain</b>    | 0.35 ± 0.08            | 0.28 ± 0.11             | 0.16 ± 0.09             |
| <b>Bone</b>     | 1.72 ± 0.42            | 1.13 ± 0.22             | 1.13 ± 0.16             |
| <b>Stomach</b>  | 2.55 ± 0.65            | 3.04 ± 0.56             | 1.82 ± 0.72             |
| <b>Gut</b>      | 5.74 ± 1.38            | 4.37 ± 0.74             | 2.68 ± 1.02             |

**Fig. S3.** Biodistribution report of C-11 TMP in female balb/c mice. 83  $\mu$ Ci of tracer was injected IV. Mice were sacrificed 2, 15 and 45 minutes post-injection. Gut includes large intestine, small intestine and colon. Mice were under anesthesia for the duration of the experiment and did not urinate limiting evaluation of the bladder.

| <b>Organ</b> | <b>Total (mSv)</b> |
|--------------|--------------------|
| Brain        | 0.06               |
| Gut          | 0.05               |
| Stomach      | 0.18               |
| Heart        | 0.52               |
| Kidneys      | 1.16               |
| Liver        | 0.87               |
| Lungs        | 0.22               |
| Muscle       | 0.10               |
| Pancreas     | 0.50               |
| Bone         | 0.16               |
| Total Body   | 0.13               |

**Fig. S4.** Estimated Human Dosimetry. Biodistribution data from female balb/c mice were used to estimate human dosimetry after [<sup>11</sup>C]TMP 10 mCi in an adult female human model that was predefined in OLINDA/EXM 1.1. Kinetic data from time points (2, 15, and 45 min) were fitted as percent-injected dose/organ over time. By fitting the kinetic data using %ID/organ we assume the [<sup>11</sup>C]TMP distribution would be relative to human and thus did not apply a scaling factor accounting for organ weight to subject total body weight between mouse and human.

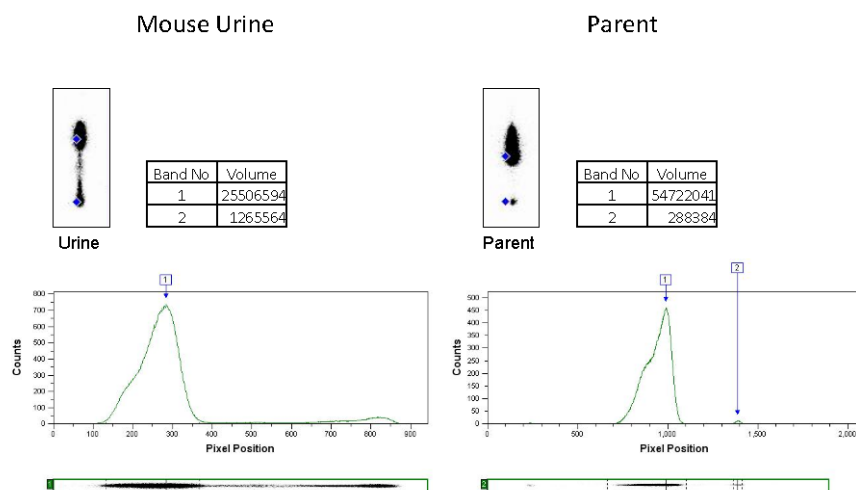

**Fig. S5.** Thin layer radio-chromatography shows the spot size and relative counts from mouse urine compared to parent [ $^{11}\text{C}$ ]TMP. A small amount of mouse urine and [ $^{11}\text{C}$ ]TMP in saline was dried on a silica plate. The spots were run on with MeOH/ $\text{CH}_2\text{Cl}_2$  (1:5). The time/length of development for each TLC was slightly different accounting for the difference in the X-axis, but the  $R_f$  values are the same for the largest spot from both samples..

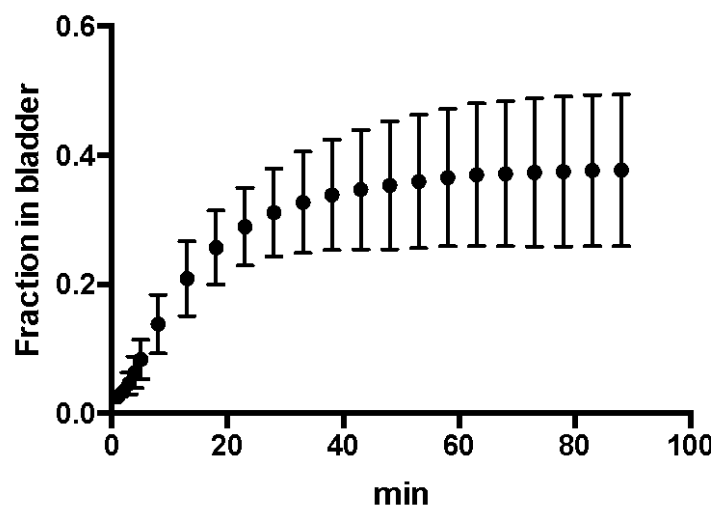

**Fig. S6.** Percent of radiosignal in the bladder while under anesthesia (no urination) as assessed by measuring the mean signal (Amide) in the bladder \* bladder volume divided by the mean signal in the animal \* whole animal volume (n=3).

Stomach

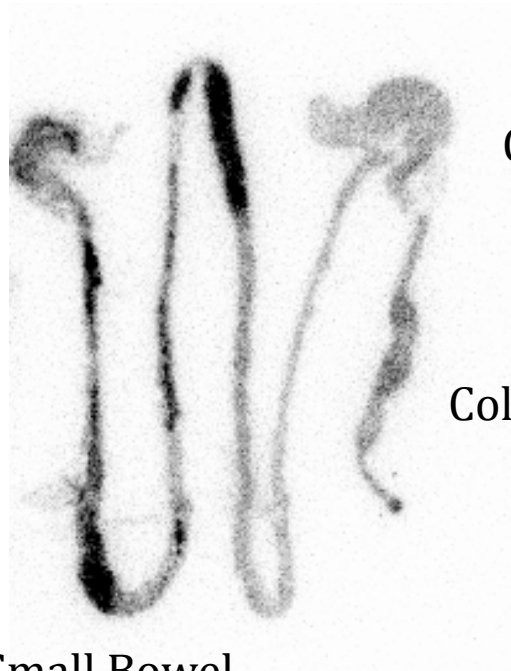

Cecum

Colon

Small Bowel

**Fig. S7.** Representative autoradiography of explanted GI tract from the stomach to the rectum.







Human cytosolic TK1

UniProtKB - P04183 (KITH\_HUMAN)

MSCINLPTVLPGPSKTRGQIQVILGPMFSGKSTELMRRVRRFQIAQYKCLVIKYAKDTR  
YSSSFCTHDRNTMEALPACLLRDVAQEALGVAVIGIDEGQFFPDIVFCEAMANAGKTVI  
VAALDGTFRKPFGAILNLVPLAESVVKLTAVCMCECFREAAAYTKRLGTEKEVEVIGGADK  
YHSVCRLCYFKKASGQPAGPDNKENCVPVPGKPGEAVAARKLFAPQQILQCSPAN

Human Herpes Virus 1 TK

UniProtKB - P03176 (KITH\_HHV11)

MASYPCHQHASAFDQAARSRGHNNRRTALRPRRQQEATEVRPEQKMPTLLRVYIDGPHGM  
GKTTTTQLLVALGSRDDIVVPEPMTYWRVLGASETIANIYTTQHRLDQGEISAGDAAVV  
MTSAQITMGMPYAVTDAVLAPHIGGEAGSSHAPPPALTLIFDRHPAIALLCYPAARYLMG  
SMTPQAVLAFVALIPPTLPGTNIVLGALPEDRHIDRLAKRQRPGERLDLAMLAAIRRVYG  
LLANTVRYLQCGGSWREDWGQLSGTAVPPQGAEPQSNAGPRPHIGDTLFTLFRAPPELLAP  
NGDLYNVFAWALDVLAKRLRSMHVFILDYDQSPAGCRDALLQLTSGMVQTHVTTGPSIPT  
ICDLARTFAREMGEAN

**Fig. S8.** Sequence alignment of *Ec* DHFR and Human DHFR and thymidine kinase from human herpes virus 1 and human cytosolic thymidine kinase. Alignment algorithm was done using EMBOSS NEEDLE Pairwise Protein Alignment.
